# Supplementary material for: The structure and chemical bonding in inverse sandwich B6Ca2and B8Ca2clusters: conflicting aromaticityvs.double aromaticity
Source: Royal Society of Chemistry journal article supplement (doi:10.1039/d0cp03703f), 2020-01-01
Supplement: d0cp03703f1.pdf [file d0cp03703f1.pdf]

## SUPPLEMENTARY INFORMATION

### The structure and chemical bonding in the inverse sandwich $B_6Ca_2$ and $B_8Ca_2$ clusters: conflicting aromaticity vs. double aromaticity†

Ying-Jin Wang,\* Min-Min Guo, Gui-Lin Wang, Chang-Qing Miao, Nan Zhang, and Teng-Dan  
Xue

*Department of Chemistry, Xinzhou Teachers University, Xinzhou 034000, China*

\*E-mail: yingjinwang@sxu.edu.cn

### Supplementary Information

- Table S1.** Cartesian coordinates for global-minimum (GM) structures of (a) ( $D_{2h}$ ,  $^1A_g$ )  $B_6Ca_2$  and (b) ( $D_{8h}$ ,  $^1A_{1g}$ )  $B_8Ca_2$  clusters at the PBE0/6-311+G\* level.
- Figure S1.** Alternative optimized structures of  $B_6Ca_2$  cluster at the PBE0/6-311+G\* level. Relative energies are shown in eV at PBE0 level with corrections for zero-point energy (ZPE), as well as for top two isomers (in square bracket) at the single-point CCSD(T)/6-311+G\*\*/PBE0/6-311+G\* level.
- Figure S2.** Alternative optimized structures of  $B_8Ca_2$  cluster at the PBE0/6-311+G\* level. Relative energies are shown in eV at PBE0 level with corrections for zero-point energy (ZPE), as well as for top four isomers (in square bracket) at the single-point CCSD(T)/6-311+G\*\*/PBE0/6-311+G\* level.
- Figure S3.** Canonical molecular orbitals (CMOs) of  $B_8Ca_2$  ( $D_{8h}$ ,  $^1A_{1g}$ ). The CMOs are sorted into three subsets: (a) eight  $\sigma$  CMOs for eight two-center two-electron (2c-2e)

Lewis B–B  $\sigma$  single bonds in  $B_8$  ring; (b) three globally delocalized CMOs for the  $\sigma$  framework in  $B_8$  ring; and (c) three globally delocalized CMOs for  $\pi$  framework in  $B_8$  ring.

**Figure S4.** Canonical molecular orbitals (CMOs) of the competitor ( $C_s, ^1A'$ ) of  $B_8Ca_2$ . The CMOs are sorted into four subsets: (a) seven  $\sigma$  CMOs for seven two-center two-electron (2c-2e) Lewis B–B  $\sigma$  single bonds in the periphery of  $B_8$  wheel; (b) two globally delocalized CMOs for  $\sigma$  framework in  $B_8$  wheel; (c) three globally delocalized CMOs for  $\pi$  framework in  $B_8$  wheel; and (d) one  $\sigma$  CMOs in  $Ca_2$  dimer, as well as the LUMO.

**Figure S5.** Chemical bonding pattern for the competitor ( $C_s, ^1A'$ ) of  $B_8Ca_2$  cluster on the basis of AdNDP analysis. Occupation numbers (ONs) are indicated.

**Figure S1.** Alternative optimized structures of  $B_6Ca_2$  cluster at the PBE0/6-311+G\* level. Relative energies are shown in eV at PBE0 level with corrections for zero-point energies (ZPEs), as well as for top two isomers (in square bracket) at the single-point CCSD(T)/6-311+G\*\*/PBE0/6-311+G\* level.

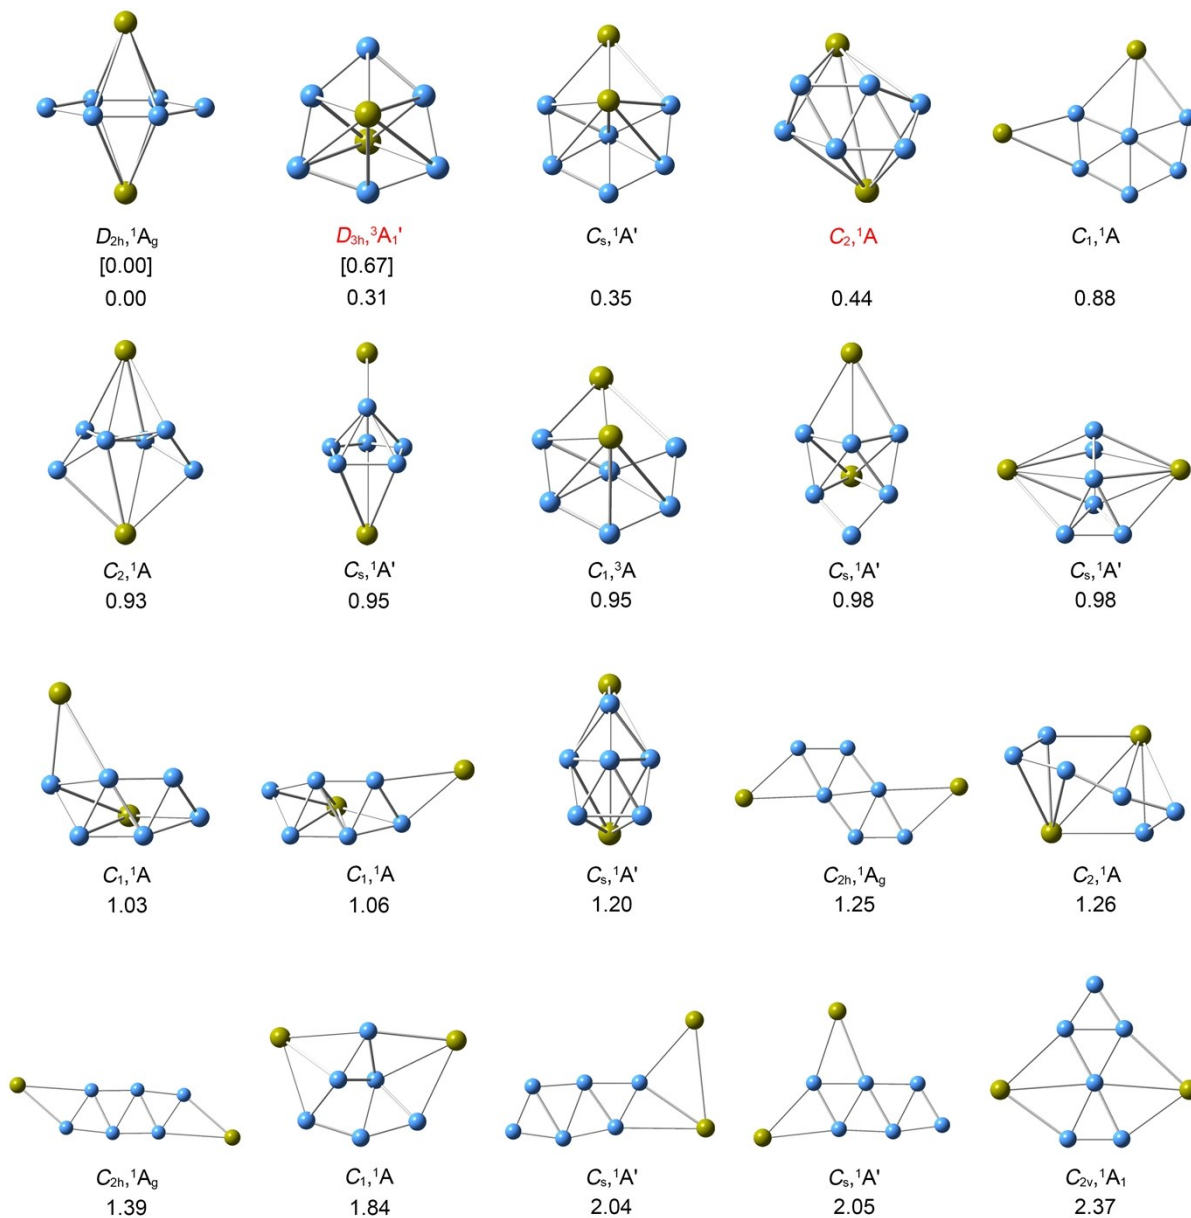

**Figure S2.** Alternative optimized structures of  $B_8Ca_2$  cluster at the PBE0/6-311+G\* level. Relative energies are shown in eV at PBE0 level with corrections for zero-point energies (ZPEs), as well as for top four isomers (in square bracket) at the single-point CCSD(T)/6-311+G\*\*/PBE0/6-311+G\* level.

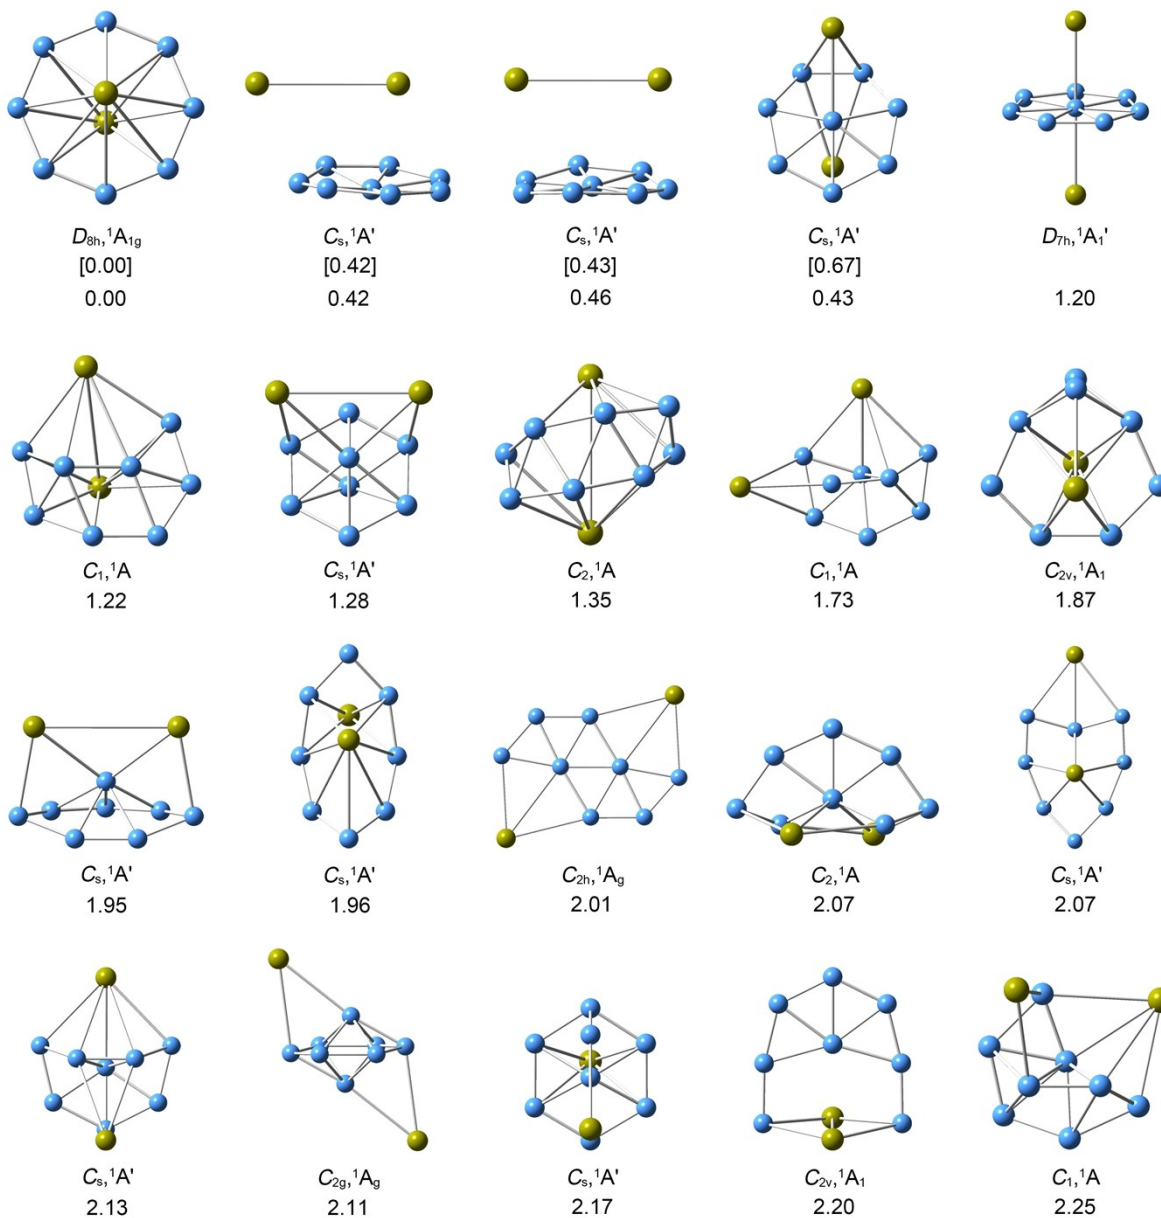

**Figure S3.** Canonical molecular orbitals (CMOs) of  $B_8Ca_2$  ( $D_{8h}$ ,  $^1A_{1g}$ ). The CMOs are sorted into three subsets: (a) eight  $\sigma$  CMOs for eight two-center two-electron (2c-2e) Lewis B–B  $\sigma$  single bonds in  $B_8$  ring; (b) three globally delocalized CMOs for the  $\sigma$  framework in  $B_8$  ring; and (c) three globally delocalized CMOs for  $\pi$  framework in  $B_8$  ring.

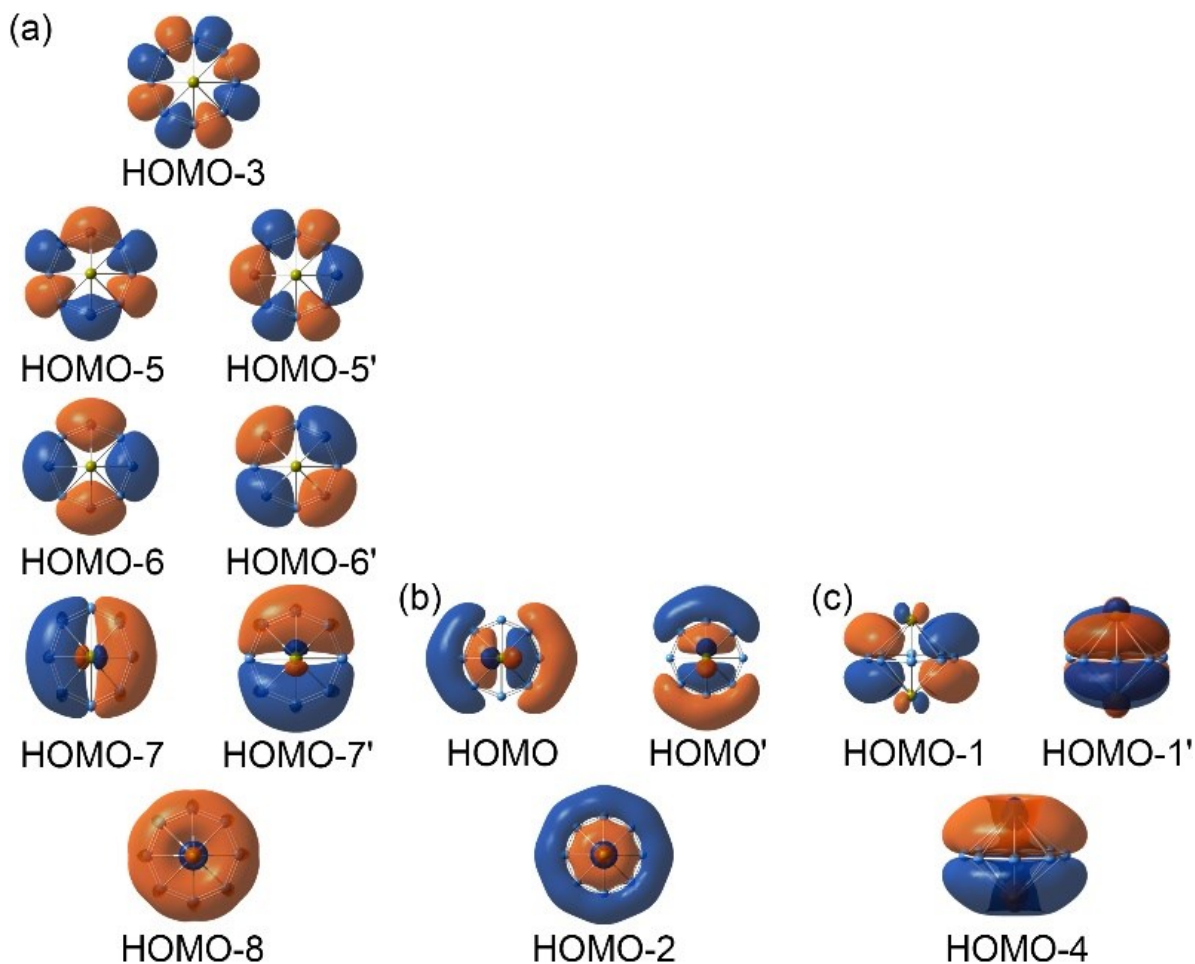

**Figure S4.** Canonical molecular orbitals (CMOs) of the competitor ( $C_s, ^1A'$ ) of  $B_8Ca_2$ . The CMOs are sorted into four subsets: (a) seven  $\sigma$  CMOs for seven two-center two-electron (2c-2e) Lewis B–B  $\sigma$  single bonds in the periphery of  $B_8$  wheel; (b) two globally delocalized CMOs for  $\sigma$  framework in  $B_8$  wheel; (c) three globally delocalized CMOs for  $\pi$  framework in  $B_8$  wheel; and (d) one  $\sigma$  CMOs in  $Ca_2$  dimer, as well as the LUMO.

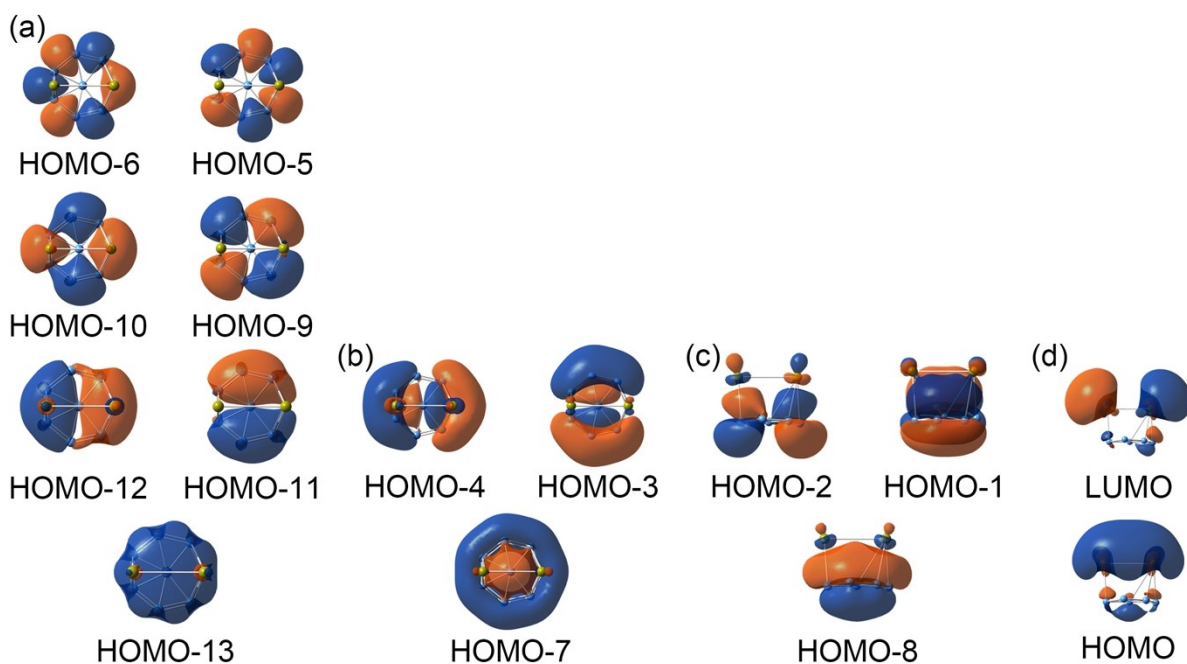

**Figure S5.** Chemical bonding pattern for the third isomer ( $C_s$ ,  $^1A'$ ) of  $B_8Ca_2$  cluster on the basis of AdNDP analysis. ONs are indicated.

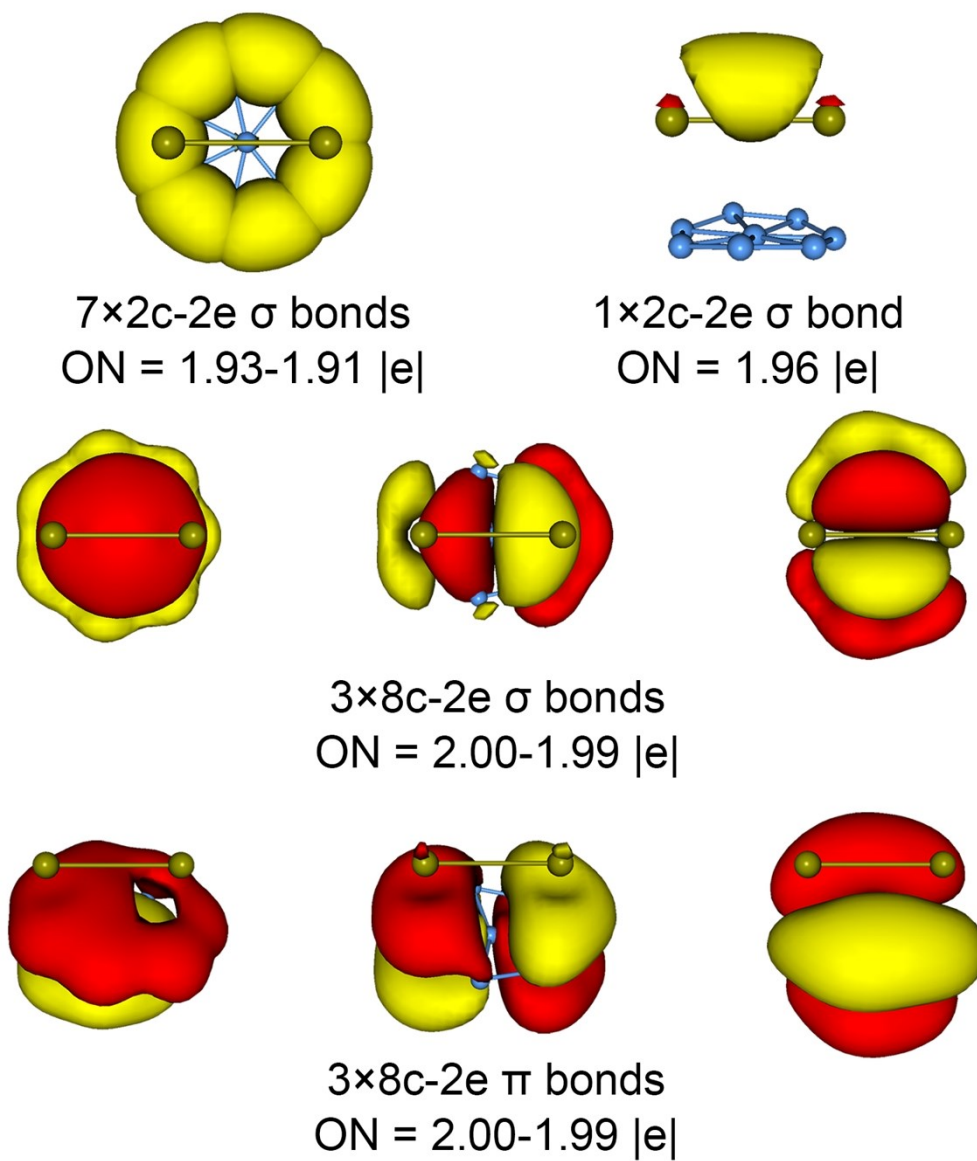

**Table S1.** Cartesian coordinates for global-minimum (GM) structures of (a) ( $D_{2h}$ ,  $^1A_g$ )  $B_6Ca_2$  and (b) ( $D_{8h}$ ,  $^1A_{1g}$ )  $B_8Ca_2$  clusters at the PBE0/6-311+G\* level.

**(a)  $B_6Ca_2$  GM ( $D_{2h}$ ,  $^1A_g$ )**

|    |             |             |             |
|----|-------------|-------------|-------------|
| B  | 0.00000000  | 1.93579800  | 0.00000000  |
| B  | 0.00000000  | -0.80223400 | 1.05404300  |
| B  | -0.00000000 | 0.80223400  | 1.05404300  |
| B  | 0.00000000  | 0.80223400  | -1.05404300 |
| B  | -0.00000000 | -0.80223400 | -1.05404300 |
| B  | 0.00000000  | -1.93579800 | 0.00000000  |
| Ca | -2.12915100 | 0.00000000  | -0.00000000 |
| Ca | 2.12915100  | 0.00000000  | -0.00000000 |

**(b)  $B_8Ca_2$  GM ( $D_{8h}$ ,  $^1A_{1g}$ )**

|    |             |             |             |
|----|-------------|-------------|-------------|
| B  | 0.00000000  | 2.02311700  | 0.00000000  |
| B  | 1.43056000  | 1.43056000  | 0.00000000  |
| B  | 0.00000000  | -2.02311700 | 0.00000000  |
| B  | -1.43056000 | 1.43056000  | 0.00000000  |
| B  | -1.43056000 | -1.43056000 | 0.00000000  |
| B  | 1.43056000  | -1.43056000 | 0.00000000  |
| B  | -2.02311700 | 0.00000000  | 0.00000000  |
| B  | 2.02311700  | 0.00000000  | 0.00000000  |
| Ca | 0.00000000  | 0.00000000  | 1.78402600  |
| Ca | 0.00000000  | 0.00000000  | -1.78402600 |
